# Supplementary material for: Light emission properties and self-assembly of a tolane-based luminogen
Source: Royal Society of Chemistry journal article supplement (doi:10.1039/c5ra04228c), 2015-01-01
Supplement: c5ra04228c1.pdf [file c5ra04228c1.pdf]

*Electronic Supplementary Information (ESI)*

**Light emission property and self-assembly of a tolane-based  
luminogen**

Ying Zang, Yi Li, Baozong Li, Hongkun Li\* and Yonggang Yang\*

*Jiangsu Key Laboratory of Advanced Functional Polymer Design and Application, College of  
Chemistry, Chemical Engineering and Materials Science, Soochow University, Suzhou 215123,  
China.*

**Table of Contents**

**Fig. S1** Particle size of **1** in acetonitrile/water mixtures with different water fractions.

Concentration: 10  $\mu\text{M}$ . S2

**Fig. S2** UV spectra of **1** in acetonitrile/water mixtures with different water fractions.

Concentration: 10  $\mu\text{M}$ . S2

**Fig. S3** WAXRD patterns of **1** prepared by evaporation of its ethanol solution with  
concentrations of (a) 10  $\text{mg mL}^{-1}$  and (b) 2.5  $\text{mg mL}^{-1}$  at 0  $^{\circ}\text{C}$ . S2

**Fig. S4** SEM images of **1** formed by evaporation of its isopropanol (A), *n*-propanol (B)  
and THF (C and D) solutions with a concentration of 10  $\text{mg mL}^{-1}$  at 0  $^{\circ}\text{C}$ . S3

**Fig. S5** CD spectrum of **1** in aggregate state formed by evaporation of its ethanol  
solution with a concentration of 2.5  $\text{mg mL}^{-1}$  at 0  $^{\circ}\text{C}$ . S3

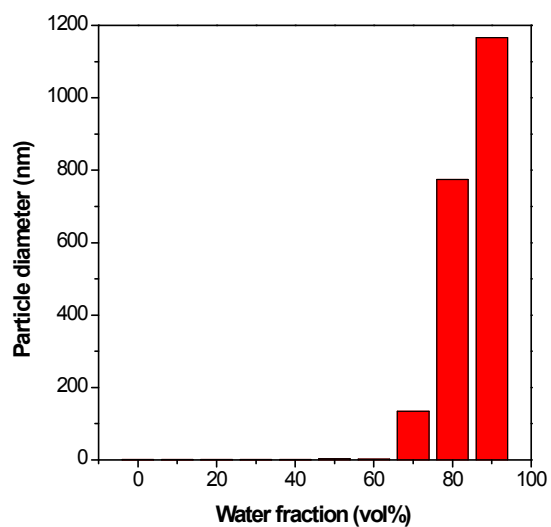

**Fig. S1** Particle size of **1** in acetonitrile/water mixtures with different water fractions. Concentration: 10  $\mu\text{M}$ .

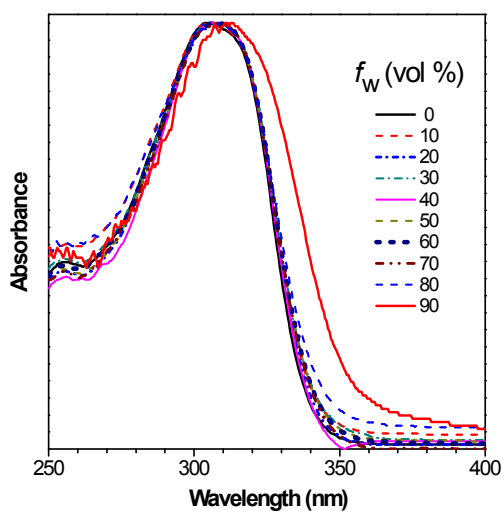

**Fig. S2** UV spectra of **1** in acetonitrile/water mixtures with different water fractions ( $f_w$ ). Concentration: 10  $\mu\text{M}$ .

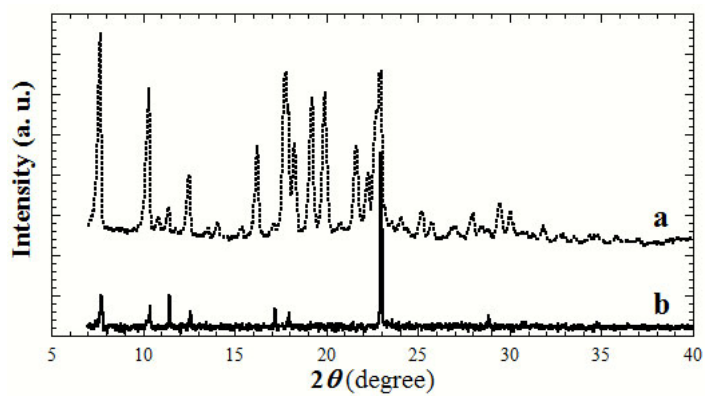

**Fig. S3** WAXRD patterns of **1** prepared by evaporation of its ethanol solution with concentrations of (a) 10  $\text{mg mL}^{-1}$  and (b) 2.5  $\text{mg mL}^{-1}$  at 0  $^{\circ}\text{C}$ .

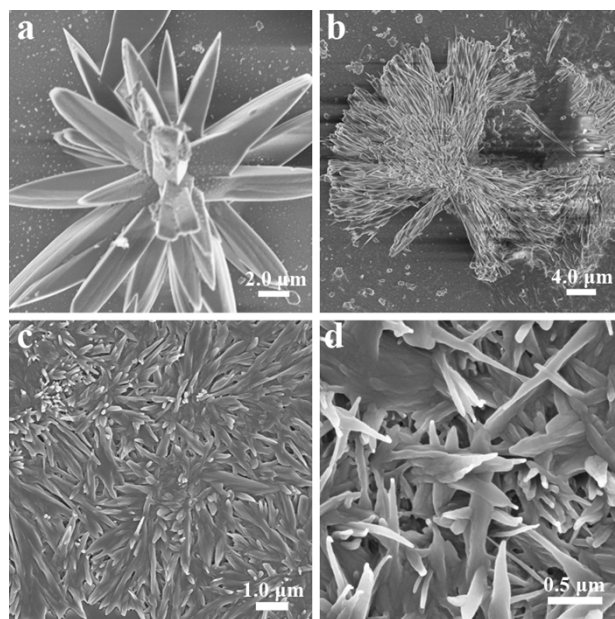

**Fig. S4** SEM images of **1** formed by evaporation of its isopropanol (a), *n*-propanol (b) and THF (c and d) solutions with a concentration of 10 mg mL<sup>-1</sup> at 0 °C.

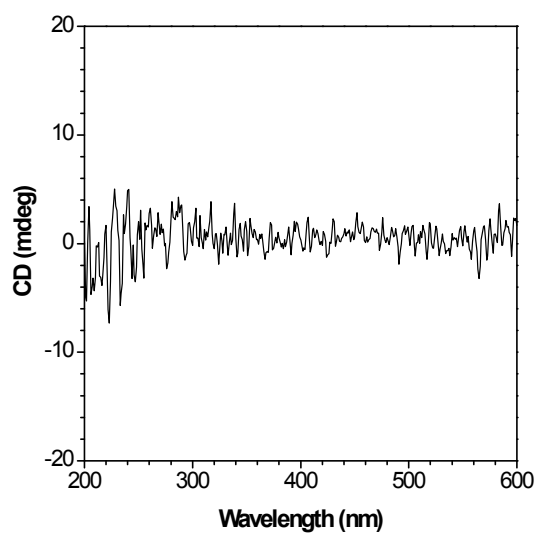

**Fig. S5** CD spectrum of **1** in aggregate state formed by evaporation of its ethanol solution with a concentration of 2.5 mg mL<sup>-1</sup> at 0 °C.
